# Supplementary material
Source: PubMed Central journal article supplement (PMC3923498)
Supplement: NIHMS469620-supplement-1.pdf [file NIHMS469620-supplement-1.pdf]

## Supporting Information

High Level of ATP Citrate Lyase Expression In Human and Rat Pancreatic Islets

Michael J. MacDonald<sup>1</sup>, Melissa J. Longacre<sup>1</sup>, Thomas F. Warner<sup>2</sup>, Ansaya Thonpho<sup>1,3</sup>

<sup>1</sup>Childrens Diabetes Center, University of Wisconsin School of Medicine and Public Health, Madison, WI 53706; <sup>2</sup>Department of Pathology & Laboratory Medicine, University of Wisconsin School of Medicine and Public Health, Madison, WI 53706;

<sup>3</sup>Department of Biochemistry, Faculty of Science, Mahidol University, Bangkok 10400, Thailand

Correspondence:

Michael J. MacDonald

Rm. 3459 Medical Science Center

1300 University Ave.

Madison, WI 53706

Tel.: +1/608/262 1195

Fax: +1/608/262 9300

Email: [mjmacdon@wisc.edu](mailto:mjmacdon@wisc.edu)

**Supplemental Table 1. Primer sequences for qPCR.**

|              | <b>Gene</b>  | <b>Primer Sequence</b>        |
|--------------|--------------|-------------------------------|
| <b>Human</b> | Acly Forward | 5'- ATCCAGAGGAAGCCTACATTGC-3' |
|              | Acly Reverse | 5'- TTTGCCAGCTCGTTGACACC-3'   |
| <b>Rat</b>   | Acly Forward | 5'-ACCCAGAGGAAGCCTACATTGC-3'  |
|              | Acly Reverse | 5'- TTCGCCAGTTCGTTGACACC-3'   |
